# Supplementary material for: Hybrid bismuth oxyhalides@gypsum as self-cleaning composites: novel aspects of a sustainable photocatalytic technology for solar environmental cleanup
Source: Royal Society of Chemistry journal article supplement (doi:10.1039/c5ra09993e), 2015-01-01
Supplement: c5ra09993e1.pdf [file c5ra09993e1.pdf]

**Hybrid Bismuth Oxyhalides@gypsum as Self-Cleaning Composites:  
Novel aspects of sustainable photocatalytic technology for solar  
environmental cleanup**

Hani Gnayem<sup>a\*</sup>, Vladimir Uvarov<sup>b</sup>, Ofer Lahad<sup>a</sup> and Yoel Sasson<sup>a\*</sup>

*Supplementary information*

<sup>a</sup> Casali Center of Applied Chemistry, The Institute of Chemistry, The Hebrew University of Jerusalem, Jerusalem 91904, Israel.

<sup>b</sup> The Unit for Nanoscopic Characterization, The Center for Nanoscience and Nanotechnology, The Hebrew University of Jerusalem, Jerusalem 91904, Israel.

**Table S1:** TOC tests results of the Naphthalene contaminated  $\text{BiOCl}_{0.8}\text{Br}_{0.2}$ @gypsum samples. The analysis shows 7.34%W of organic carbon before treatment and only 0.41%W after illumination

**Analysis Name** Naphth-Hani.adb

Template Name Naphthalene\_2.tdb

Method Name N / A

Operator Administrator

Date Tuesday, April 21, 2015  
Time 10:45

Start Oven Temp. 1052 °C  
Start Cooler Temp. 1 °C

Version 1.73 Release  
Info

**Element** **Integration Time**  
Carbon 300 s

SampleTimeTC 600 s  
SampleTimeIC 250 s

| No | Type | FileName | Date/Time            | Max. Area | Max Cont.             | Order | Correlation | R-squared | Sel. | Range |
|----|------|----------|----------------------|-----------|-----------------------|-------|-------------|-----------|------|-------|
| 1  | TC   | TCHR1    | Dec 10 2014, 7:39    | 5938144   | 39.032                | 1     | 0.99696     | 0.99392   | Yes  | High  |
|    |      | A2: 0    | AI: 155360.345537063 |           | AO: 45589.999112087   |       |             |           |      |       |
| 2  | IC   | ICHR2    | Dec 10 2014, 9:37    | 4815568   | 31.174                | 1     | 0.99879     | 0.99758   | Yes  | High  |
|    |      | A2: 0    | AI: 156773.147367749 |           | AO: 59565.2907027456  |       |             |           |      |       |
| 3  | IC   | ICLR2    | Dec 10 2014, 9:14    | 5189985   | 1.4388                | 1     | 0.99538     | 0.99077   | Yes  | Low   |
|    |      | A2: 0    | AI: 3526068.30828969 |           | AO: -613874.999999989 |       |             |           |      |       |
| 4  | TC   | TCLR1    | Dec 10 2014, 8:17    | 3563242   | 1.00912               | 1     | 0.96710     | 0.93528   | Yes  | Low   |
|    |      | A2: 0    | AI: 3936174.45291626 |           | AO: 613226.986797435  |       |             |           |      |       |
| 5  | IC   | ICHR3    | Feb 17 2015, 9:32    | 1672576   | 10.791                | 1     | 0.99960     | 0.99921   | Yes  | High  |
|    |      | A2: 0    | AI: 153262.106439902 |           | AO: -19161.8525846356 |       |             |           |      |       |
| 6  | TC   | TCHR2    | Feb 22 2015, 9:50    | 1416074   | 8.83456               | 1     | 0.99937     | 0.99873   | Yes  | High  |
|    |      | A2: 0    | AI: 161015.658987825 |           | AO: -8383.09200853162 |       |             |           |      |       |

| Inj. Order | Position | Type               | Identification | Range          |                |      |        |        |          |
|------------|----------|--------------------|----------------|----------------|----------------|------|--------|--------|----------|
| 1          | 1        | Unknown            | 1              | High           |                |      |        |        |          |
|            |          | Injection Type     | Conc.(%)       | Area           | Weight         |      |        |        |          |
|            |          | <b>TC</b>          | <b>7.34</b>    | <b>7752845</b> | <b>656 mg</b>  |      |        |        |          |
|            | Sample   | Injection Time     | Conc.(%)       | Area           | Curve          | Oven | Cooler | Edited | Selected |
|            | 1        | 4/21/2015 10:46:07 | 7.34           | 7752845        | 6              | 1052 | 2      | E      | Yes      |
| 2          | 2        | Unknown            | 2              | High           |                |      |        |        |          |
|            |          | Injection Type     | Conc.(%)       | Area           | Weight         |      |        |        |          |
|            |          | <b>TC</b>          | <b>0.41</b>    | <b>765053</b>  | <b>1158 mg</b> |      |        |        |          |
|            | Sample   | Injection Time     | Conc.(%)       | Area           | Curve          | Oven | Cooler | Edited | Selected |
|            | 1        | 4/21/2015 10:56:27 | 0.41           | 765053         | 6              | 1049 | 1      | E      | Yes      |

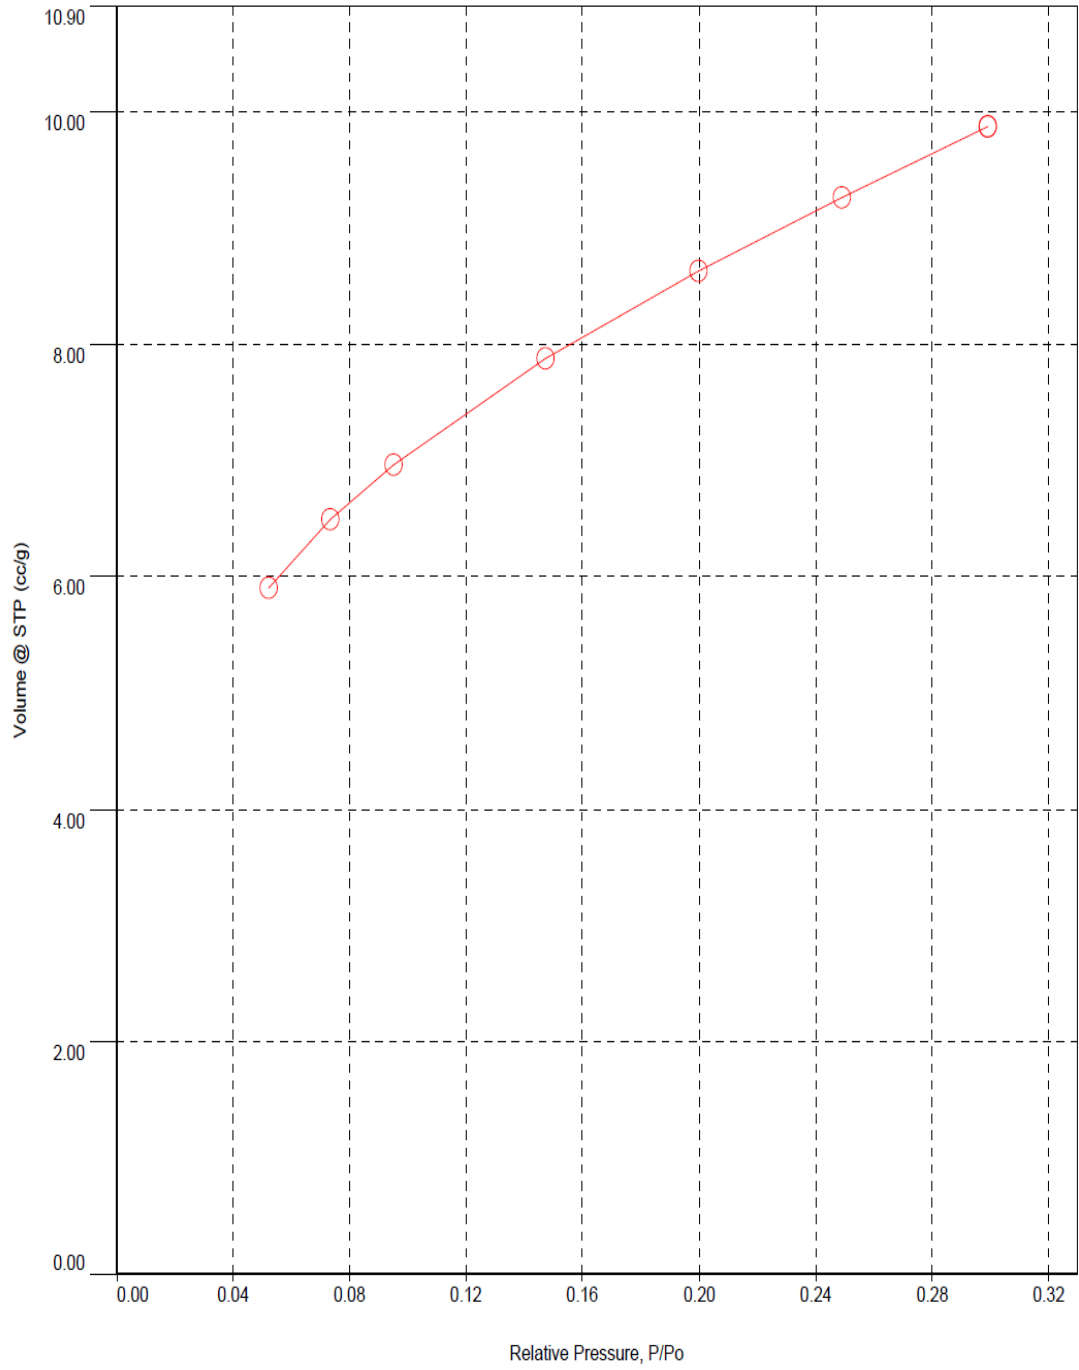

**Figure S1.** BET surface area isotherm ( $A_{ds}$ ) for  $\text{BiOCl}_{0.8}\text{Br}_{0.2}$  semiconductor
